# Supplementary material for: The positive influence of fullerene derivatives bonded to manganese(iii) porphyrins on water proton relaxation
Source: Royal Society of Chemistry journal article supplement (doi:10.1039/c4dt03482a), 2015-01-01
Supplement: c4dt03482a1.pdf [file c4dt03482a1.pdf]

Figure S2.  $^1\text{H}$  NMR spectra of APTSPP in  $d_6$ -DMSO.

Figure S2.  $^1\text{H}$  NMR ( $d_6$ -DMSO) $\delta$ : 8.95 (br, 2H,  $\beta$ -pyrrole), 8.82 (br, 6H,  $\beta$ -pyrrole), 8.16 (m, 6H, ortho triphenyl), 8.05 (m, 6H, meta triphenyl), 7.89 (br, 2H, 4-aminophenyl), 7.02 (br, 2H, 4-aminophenyl), 4.36 (s, 2H, amino), -2.87 (2H, pyrrole NH).

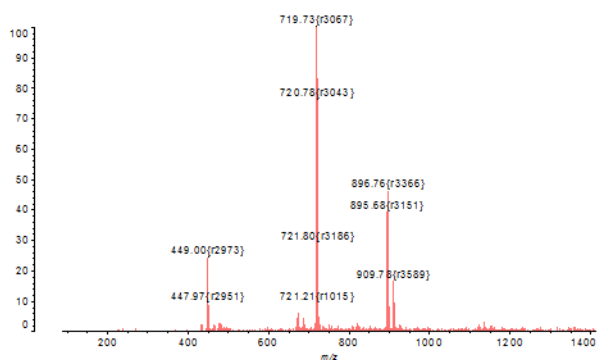

Figure S3. MALDI-TOF-MS of [6, 6]-phenyl- $\text{C}_{61}$ -butyric acid.

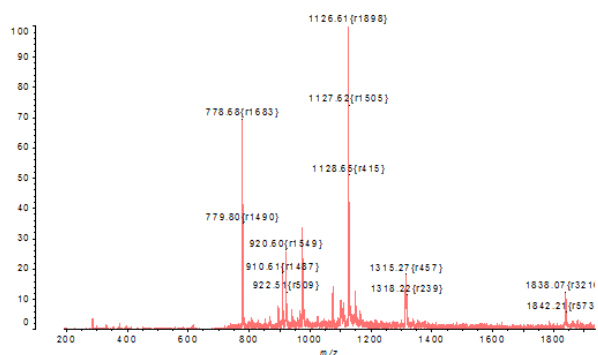

Figure S4. MALDI-TOF-MS of  $\text{PC}_{61}\text{BA-APTSPP-Mn}$ .

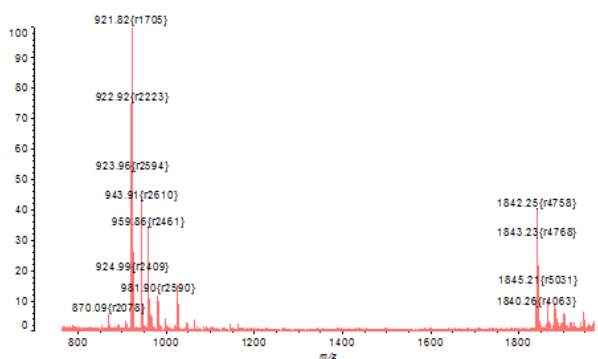

Figure S5. MALDI-TOF-MS of APTSPP-Mn.

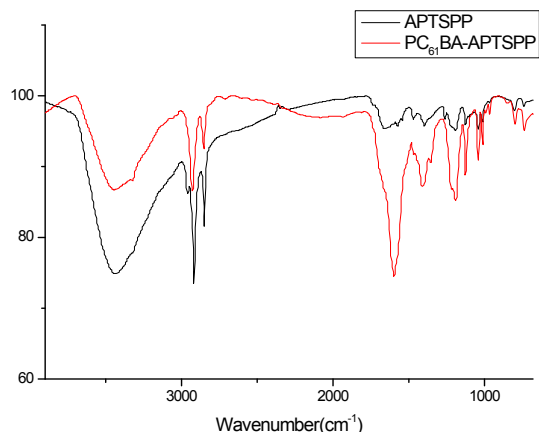

Figure S6. FTIR spectra of APTSPP and PC<sub>61</sub>BA-APTSP.

In Figure S6, compared with IR spectra of APTSPP, PC<sub>61</sub>BA-APTSP showed much stronger absorption at 1598, 1407, 1189 cm<sup>-1</sup>, which should belong to the characteristic absorption of PC<sub>61</sub>BA (*J. Org. Chem., Vol.60, No. 3, 1995*). The other enhanced absorption may be attributed to the formation of conjugation system between PC<sub>61</sub>BA and APTSPP, since IR absorption is generally strengthened after formation of conjugation system.

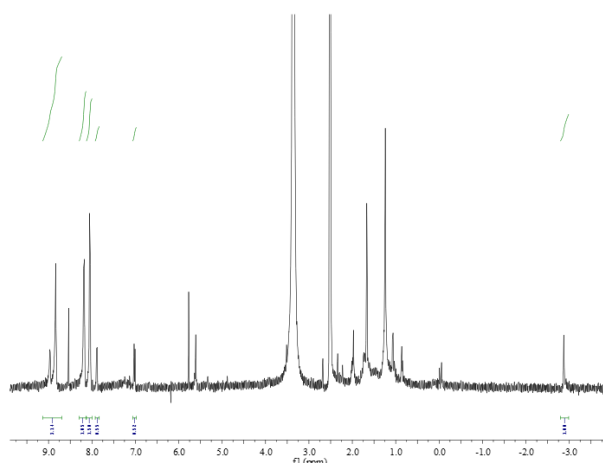

Figure S7. <sup>1</sup>H NMR spectrum of PC<sub>61</sub>BA-APTSP in *d*<sub>6</sub>-DMSO.

In Figure S7, <sup>1</sup>H NMR (*d*<sub>6</sub>-DMSO)δ: 8.97 (br, 2H, β-pyrrole), 8.83 (br, 6H, β-pyrrole), 8.18 (m, 6H, ortho triphenyl), 8.05 (m, 6H, meta triphenyl), 7.89 (br, 2H, 4-aminophenyl), 7.02 (br, 2H, 4-aminophenyl), 5.77 (s, 2H, -CONH-), -2.87 (2H, pyrrole NH). Due to the overlapping between PC<sub>61</sub>BA and APTSPP, it seems difficult to distinguish the chemical shift from the benzene ring of PC<sub>61</sub>BA, but the chemical shift from alkane of PC<sub>61</sub>BA can be found around δ 1.6-2.1 ppm.

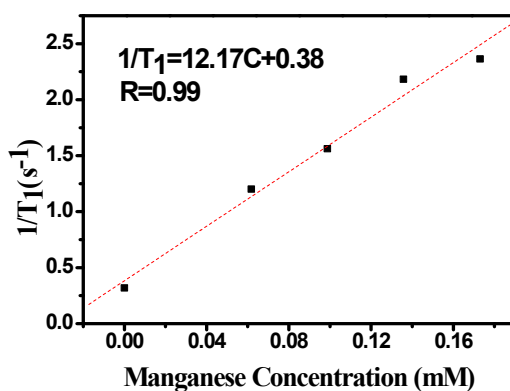

Figure S8. Linear relationship between  $T_1$  relaxation rates ( $1/T_1$ ) and manganese concentrations for PC<sub>61</sub>BA-APTSPP-Mn in water at 3 T and 300 K.

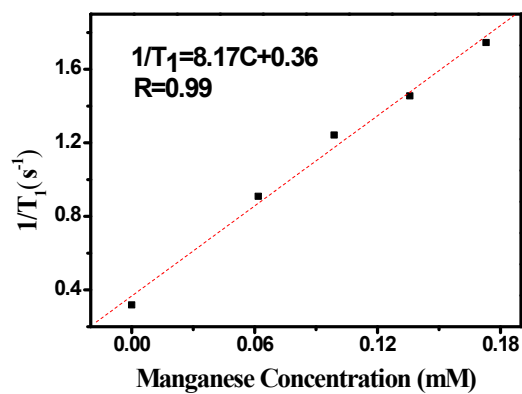

Figure S9. Linear relationship between  $T_1$  relaxation rates ( $1/T_1$ ) and manganese concentrations for APTSPP-Mn in water at 3 T and 300 K.
